# Supplementary material for: Prevalence of multimorbidity and its associations with hospitalisation or death in Japan 2014–2019: a retrospective cohort study using nationwide medical claims data in the middle-aged generation
Source: PubMed Central journal article supplement — BMJ Open. 2023 May 9;13(5):e063216. doi: 10.1136/bmjopen-2022-063216 (PMC10173978; doi:10.1136/bmjopen-2022-063216), 2023-05-09
Supplement: bmjopen-2022-063216supp001.pdf [file bmjopen-2022-063216supp001.pdf]

## Supplementary material

Title: The prevalence of multimorbidity and its associations with hospitalisation or death in Japan 2014-2019 - a retrospective cohort study using nationwide medical claims data in the middle-aged generation

Authors: Yoshiyuki Saito PharmD, Ataru Igarashi PhD, Takeo Nakayama MD PhD, Shingo Fukuma MD

**Supplementary eTable 1.** List of diseases and their ICD-10 codes used to define diseases in medical claims data

**Supplementary eTable 2.** Characteristics of baseline data in fiscal year 2014 and cohort data

**Supplementary eTable 3A.** Diagnosed disease prevalence in fiscal year 2014 applied to the Japanese total population by gender

**Supplementary eTable 3B.** Diagnosed disease prevalence in fiscal year 2014 applied to the Japanese total population by age group

**Supplementary eTable 4.** Hazard ratios in multimorbid individuals based on hospitalisation or death rates in a 5-year cohort of  $n = 111\,088$  men and  $n = 70\,871$  women. Cox regression analysis

**Supplementary eTable 1. List of diseases and their ICD-10 codes used to define diseases in medical claims data**

| <b>Diseases</b>                             | <b>ICD-10 codes</b>                                                                                                                                                                                            |
|---------------------------------------------|----------------------------------------------------------------------------------------------------------------------------------------------------------------------------------------------------------------|
| AIDS/HIV                                    | B20.x-B22.x, B24.x                                                                                                                                                                                             |
| Any malignancy, incl. leukemia and lymphoma | C00.x-C26.x, C30.x-C34.x, C37.x-C41.x, C45.x-C58.x, C60.x-C76.x, C81.x-C85.x, C88.3, C88.7, C88.9, C90.0, C90.1, C91.x-C93.x, C94.0-C94.3, C94.5, C94.7, C95.x, C96.x, C43.x, C88.0-C88.2, C90.2, C94.4, C97.x |
| Cerebrovascular disease                     | I69.x, G45.x, G46.x, H34.0, I60.x-I68.x                                                                                                                                                                        |
| Chronic pulmonary disease                   | J41.x-J47.x, J60.x-J66.x, I27.8, I27.9, J40.x, J67.x, J68.4, J70.1, J70.3                                                                                                                                      |
| Congestive heart failure                    | I50.x, I09.9, I11.0, I13.0, I13.2, I25.5, I42.0, I42.5- I42.9, I43.x, P29.0                                                                                                                                    |
| Dementia                                    | F00.x-F02.x, F03.x, F05.1, G30.x, G31.1                                                                                                                                                                        |
| Diabetes with chronic complication          | E10.2-E10.4, E11.2-E11.4, E13.2-E13.4, E14.2-E14.4, E10.5, E10.7, E11.5, E11.7, E12.2-E12.5, E12.7, E13.5, E13.7, E14.5, E14.7                                                                                 |
| Diabetes without chronic complication       | E10.1, E10.9, E11.1, E11.9, E13.1, E13.9, E14.1, E14.9, E10.0, E10.6, E10.8, E11.0, E11.6, E11.8, E12.0, E12.1, E12.6, E12.8, E12.9, E13.0, E13.6, E13.8, E14.0, E14.6, E14.8                                  |
| Hemiplegia or paraplegia                    | G81.x, G82.0-G82.2, G04.1, G11.4, G80.1, G80.2, G82.3-G82.5, G83.0-G83.4, G83.9                                                                                                                                |
| Metastatic solid tumor                      | C77.x-C79.x, C80.x                                                                                                                                                                                             |
| Mild liver disease                          | K70.3, K71.7, K73.x, K74.3- K74.6, B18.x, K70.0-K70.2, K70.9, K71.3-K71.5, K74.0-K74.2, K76.0, K76.2-K76.4, K76.8, K76.9, Z94.4                                                                                |
| Moderate or severe liver disease            | K72.1, K72.9, K76.6, K76.7, I85.0, I85.9, I86.4, I98.2, K70.4, K71.1, K76.5                                                                                                                                    |
| Myocardial infarction                       | I25.2, I21.x, I22.x                                                                                                                                                                                            |
| Peptic ulcer disease                        | K25.4-K25.7, K26.4-K26.7, K27.4-K27.7, K28.4-K28.7, K25.0-K25.3, K25.9, K26.0-K26.3, K26.9, K27.0-K27.3, K27.9, K28.0-K28.3, K28.9                                                                             |
| Peripheral vascular disease                 | I71.x, I73.9, Z95.8, Z95.9, I70.x, I73.1, I73.8, I77.1, I79.0, I79.2, K55.1, K55.8, K55.9                                                                                                                      |

|                      |                                                                                                               |
|----------------------|---------------------------------------------------------------------------------------------------------------|
| Renal disease        | N18.x, I12.0, I13.1, N03.2-N03.7, N05.2-N05.7, N19.x, N25.0, Z49.0-Z49.2, Z94.0, Z99.2                        |
| Rheumatology disease | M05.x, M06.0, M32.x, M33.2, M34.x, M35.3, M06.1-M06.4, M06.8, M06.9, M31.5, M33.0, M33.1, M33.9, M35.1, M36.0 |

**Supplementary eTable 2. Characteristics of baseline data in fiscal year 2014 and cohort data**

|                             | Baseline data in FY2014 |         | Cohort data |         | P-value <sup>c</sup> |
|-----------------------------|-------------------------|---------|-------------|---------|----------------------|
| <i>N</i>                    | 242,360                 | (100%)  | 181,959     | (100%)  |                      |
| Men                         | 142,471                 | (58.8%) | 111,088     | (61.1%) | <0.01                |
| Age (Mean, SD)              | 44.5                    | (12.5)  | 44.7        | (10.6)  | <0.01                |
| 20-24                       | 18,524                  | (7.6%)  | 5,052       | (2.8%)  | <0.01                |
| 25-29                       | 17,251                  | (7.1%)  | 12,675      | (7.0%)  |                      |
| 30-34                       | 18,093                  | (7.5%)  | 14,784      | (8.1%)  |                      |
| 35-39                       | 23,878                  | (9.9%)  | 20,508      | (11.3%) |                      |
| 40-44                       | 39,721                  | (16.4%) | 35,168      | (19.3%) |                      |
| 45-49                       | 40,908                  | (16.9%) | 37,124      | (20.4%) |                      |
| 50-54                       | 29,466                  | (12.2%) | 25,906      | (14.2%) |                      |
| 55-59                       | 20,149                  | (8.3%)  | 13,052      | (7.2%)  |                      |
| 60-64                       | 21,278                  | (8.8%)  | 10,735      | (5.9%)  |                      |
| 65-69                       | 11,931                  | (4.9%)  | 6,246       | (3.4%)  |                      |
| 70-71                       | 1,161                   | (0.5%)  | 709         | (0.4%)  |                      |
| AIDS/HIV                    | 94                      | (0.0%)  | 74          | (0.0%)  | 0.76                 |
| Any malignancy <sup>a</sup> | 11,343                  | (4.7%)  | 8,377       | (4.6%)  | 0.24                 |
| Cerebrovascular disease     | 9,860                   | (4.1%)  | 6,971       | (3.8%)  | <0.01                |
| Chronic pulmonary disease   | 41,866                  | (17.3%) | 32,093      | (17.6%) | <0.01                |
| Congestive heart failure    | 7,751                   | (3.2%)  | 5,710       | (3.1%)  | 0.27                 |
| Dementia                    | 291                     | (0.1%)  | 190         | (0.1%)  | 0.13                 |
| Diabetes mellitus           | 25,716                  | (10.6%) | 18,755      | (10.3%) | <0.01                |
| Hemiplegia or paraplegia    | 729                     | (0.3%)  | 507         | (0.3%)  | 0.19                 |

|                                                      |                                |         |                    |         |                            |
|------------------------------------------------------|--------------------------------|---------|--------------------|---------|----------------------------|
| Liver disease                                        | 25,999                         | (10.7%) | 19,725             | (10.8%) | 0.24                       |
| Metastatic solid tumor                               | 2,381                          | (1.0%)  | 1,823              | (1.0%)  | 0.53                       |
| Myocardial infarction                                | 1,526                          | (0.6%)  | 1,092              | (0.6%)  | 0.22                       |
| Peptic ulcer disease                                 | 24,859                         | (10.3%) | 18,594             | (10.2%) | 0.68                       |
| Peripheral vascular disease                          | 9,623                          | (4.0%)  | 7,083              | (3.9%)  | 0.20                       |
|                                                      | <b>Baseline data in FY2014</b> |         | <b>Cohort data</b> |         | <b>P-value<sup>c</sup></b> |
| <i>N</i>                                             | 242,360                        | (100%)  | 181,959            | (100%)  |                            |
| Renal disease                                        | 2,350                          | (1.0%)  | 1,747              | (1.0%)  | 0.75                       |
| Rheumatologic disease                                | 3,931                          | (1.6%)  | 2,926              | (1.6%)  | 0.72                       |
| At least one disease among the top five <sup>b</sup> | 69,014                         | (28.5%) | 50,660             | (27.8%) | <0.01                      |
| Disease no. among CCI (Mean, SD)                     | 0.8                            | (1.6)   | 0.8                | (1.6)   | 0.16                       |
| 0 disease                                            | 169,872                        | (70.1%) | 129,037            | (70.9%) | <0.01                      |
| 1 disease                                            | 22,514                         | (9.3%)  | 15,532             | (8.5%)  |                            |
| 2 diseases                                           | 16,605                         | (6.9%)  | 12,375             | (6.8%)  |                            |
| 3 diseases                                           | 12,242                         | (5.1%)  | 9,046              | (5.0%)  |                            |
| 4 diseases                                           | 9,076                          | (3.7%)  | 6,816              | (3.7%)  |                            |
| ≥ 5 diseases                                         | 12,051                         | (5.0%)  | 9,153              | (5.0%)  |                            |
| Multimorbidity (≥2 diseases among CCI)               | 49,974                         | (20.6%) | 37,390             | (20.5%) |                            |
| Composite outcomes                                   | 36,893                         | (15.2%) | 31,224             | (17.2%) | <0.01                      |
| Death                                                | 1,507                          | (0.6%)  | 1,507              | (0.8%)  |                            |
| Hospitalisation                                      | 36,495                         | (15.1%) | 30,826             | (16.9%) |                            |

<sup>a</sup> Any malignancy includes leukemia and lymphoma.

<sup>b</sup> Top 5 diseases include chronic pulmonary disease, diabetes mellitus, liver disease, peptic ulcer disease, and cerebrovascular disease.

SD; standard deviation, CCI; Charlson Comorbidity Index

<sup>c</sup> Age (Mean) and Co-morbidity no. (Mean): Student's t-test. All other variables: Pearson's chi-square test.

Supplementary eTable 3A. Prevalence of diagnosed diseases in FY2014 applied to the Japanese total population by gender

|                             | Baseline data in FY2014 |      |           |      |           |      | Japanese total population |      |              |      |              |      |
|-----------------------------|-------------------------|------|-----------|------|-----------|------|---------------------------|------|--------------|------|--------------|------|
|                             | Overall                 |      | Men       |      | Women     |      | Overall                   |      | Men          |      | Women        |      |
|                             | N=246,671               | %    | N=144,237 | %    | N=102,434 | %    | N=88,923,000              | %    | N=44,288,000 | %    | N=44,640,000 | %    |
| Men                         | 144,237                 | 58.5 | -         | -    | -         | -    | 44,288,000                | 49.8 | -            | -    | -            | -    |
| Age (Mean, SD)              | 45.0                    | 12.9 | 44.6      | 12.9 | 45.7      | 12.8 | 48.0                      | 15.3 | 47.7         | 15.3 | 48.4         | 15.4 |
| 20-24                       | 18,524                  | 7.5  | 11,315    | 7.8  | 7,209     | 7.0  | 6,203,000                 | 7.0  | 3,192,000    | 7.2  | 3,012,000    | 6.7  |
| 25-29                       | 17,251                  | 7.0  | 12,014    | 8.3  | 5,237     | 5.1  | 6,677,000                 | 7.5  | 3,414,000    | 7.7  | 3,264,000    | 7.3  |
| 30-34                       | 18,093                  | 7.3  | 11,104    | 7.7  | 6,989     | 6.8  | 7,466,000                 | 8.4  | 3,788,000    | 8.6  | 3,680,000    | 8.2  |
| 35-39                       | 23,878                  | 9.7  | 13,278    | 9.2  | 10,600    | 0.3  | 8,670,000                 | 9.8  | 4,394,000    | 9.9  | 4,276,000    | 9.6  |
| 40-44                       | 39,721                  | 16.1 | 21,640    | 15.0 | 18,081    | 17.7 | 9,793,000                 | 11.0 | 4,956,000    | 11.2 | 4,837,000    | 10.8 |
| 45-49                       | 40,908                  | 16.6 | 24,191    | 16.8 | 16,717    | 16.3 | 8,609,000                 | 9.7  | 4,329,000    | 9.8  | 4,278,000    | 9.6  |
| 50-54                       | 29,466                  | 11.9 | 17,577    | 12.2 | 11,889    | 11.6 | 7,790,000                 | 8.8  | 3,903,000    | 8.8  | 3,887,000    | 8.7  |
| 55-59                       | 20,149                  | 8.2  | 11,343    | 7.9  | 8,806     | 8.6  | 7,653,000                 | 8.6  | 3,802,000    | 8.6  | 3,853,000    | 8.6  |
| 60-64                       | 21,278                  | 8.6  | 12,706    | 8.8  | 8,572     | 8.4  | 8,979,000                 | 0.1  | 4,406,000    | 9.9  | 4,573,000    | 10.2 |
| 65-69                       | 11,931                  | 4.8  | 6,768     | 4.7  | 5,163     | 5.0  | 9,155,000                 | 10.3 | 4,414,000    | 10.0 | 4,741,000    | 10.6 |
| 70-74                       | 5,472                   | 2.2  | 2,301     | 1.6  | 3,171     | 3.1  | 7,928,000                 | 8.9  | 3,690,000    | 8.3  | 4,239,000    | 9.5  |
| AIDS/                       |                         |      |           |      |           |      |                           |      |              |      |              |      |
| HIV                         | 96                      | 0.0  | 62        | 0.0  | 34        | 0.0  | 34,034                    | 0.0  | 18,979       | 0.0  | 15,055       | 0.0  |
| Any malignancy <sup>a</sup> | 12,047                  | 4.9  | 5,611     | 3.9  | 6,436     | 6.3  | 5,775,260                 | 6.5  | 2,668,349    | 6.0  | 3,106,911    | 7.0  |
| Cerebrovascular disease     | 10,866                  | 4.4  | 6,510     | 4.5  | 4,356     | 4.3  | 5,773,295                 | 6.5  | 3,023,765    | 6.8  | 2,749,530    | 6.2  |
| Chronic pulmonary disease   | 43,216                  | 17.5 | 22,484    | 15.6 | 20,732    | 20.2 | 17,303,735                | 19.5 | 7,713,864    | 17.4 | 9,589,871    | 21.5 |
| Congestive heart failure    | 8,497                   | 3.4  | 5,515     | 3.8  | 2,982     | 2.9  | 4,317,076                 | 4.9  | 2,459,170    | 5.6  | 1,857,906    | 4.2  |
| Dementia                    | 447                     | 0.2  | 210       | 0.1  | 237       | 0.2  | 410,326                   | 0.5  | 179,350      | 0.4  | 230,976      | 0.5  |
| Diabetes mellitus           | 27,344                  | 11.1 | 17,881    | 12.4 | 9,463     | 9.2  | 12,689,040                | 14.3 | 7,122,240    | 16.1 | 5,566,801    | 12.5 |
| Hemiplegia or paraplegia    | 813                     | 0.3  | 533       | 0.4  | 280       | 0.3  | 424,609                   | 0.5  | 253,040      | 0.6  | 171,569      | 0.4  |
| Liver disease               | 27,127                  | 11.0 | 16,954    | 11.8 | 10,173    | 9.9  | 11,341,444                | 2.8  | 6,031,029    | 13.6 | 5,310,415    | 11.9 |
| Metastatic solid tumor      | 2,532                   | 1.0  | 1,263     | 0.9  | 1,269     | 1.2  | 1,235,336                 | 1.4  | 598,734      | 1.4  | 636,601      | 1.4  |
| Myocardial infarction       | 1,628                   | 0.7  | 1,325     | 0.9  | 303       | 0.3  | 769,977                   | 0.9  | 575,894      | 1.3  | 194,083      | 0.4  |
| Peptic ulcer disease        | 26,047                  | 10.6 | 14,511    | 10.1 | 11,536    | 11.3 | 11,238,524                | 12.6 | 5,485,994    | 12.4 | 5,752,530    | 12.9 |
| Peripheral vascular disease | 10,407                  | 4.2  | 5,723     | 4.0  | 4,684     | 4.6  | 5,197,644                 | 5.8  | 2,503,359    | 5.7  | 2,694,285    | 6.0  |
| Renal disease               | 2,573                   | 1.0  | 1,751     | 1.2  | 822       | 0.8  | 1,261,138                 | 1.4  | 784,770      | 1.8  | 476,367      | 1.1  |
| Rheumatologic disease       | 4,146                   | 1.7  | 1,397     | 1.0  | 2,749     | 2.7  | 1,928,685                 | 2.2  | 530,072      | 1.2  | 1,398,613    | 3.1  |
| ≥1 disease among top 5      | 71,880                  | 29.1 | 40,833    | 28.3 | 31,047    | 30.3 | 30,041,150                | 33.8 | 14,676,045   | 33.1 | 15,365,106   | 34.4 |
| Disease no. among CCI       |                         |      |           |      |           |      |                           |      |              |      |              |      |
| no disease                  | 171,140                 | 69.4 | 101,857   | 70.6 | 69,283    | 67.6 | 57,293,691                | 64.4 | 29,006,814   | 65.5 | 28,286,877   | 63.4 |
| 1 disease                   | 22,947                  | 9.3  | 12,032    | 8.3  | 10,915    | 10.7 | 8,464,436                 | 9.5  | 3,702,220    | 8.4  | 4,762,216    | 10.7 |
| 2 diseases                  | 17,120                  | 6.9  | 8,994     | 6.2  | 8,126     | 7.9  | 6,799,080                 | 7.6  | 3,029,535    | 6.8  | 3,769,544    | 8.4  |
| 3 diseases                  | 12,822                  | 5.2  | 7,273     | 5.0  | 5,549     | 5.4  | 5,534,827                 | 6.2  | 2,652,231    | 6.0  | 2,882,596    | 6.5  |
| 4 diseases                  | 9,588                   | 3.9  | 5,874     | 4.1  | 3,714     | 3.6  | 4,261,753                 | 4.8  | 2,242,062    | 5.1  | 2,019,691    | 4.5  |
| ≥ 5 diseases                | 13,054                  | 5.3  | 8,207     | 5.7  | 4,847     | 4.7  | 6,574,213                 | 7.4  | 3,655,138    | 8.3  | 2,919,075    | 6.5  |
| Multimorbidity              | 52,584                  | 21.3 | 30,348    | 21.0 | 22,236    | 21.7 | 23,169,873                | 26.1 | 11,578,966   | 26.1 | 11,590,906   | 26.0 |

(≥2 diseases among  
CCI)

---

Values are numbers (%) unless otherwise

<sup>a</sup> Any malignancy includes leukemia and  
lymphoma.

FY; fiscal year

SD; standard deviation

CCI; Charlson Comorbidity Index

**Supplementary eTable 3B. Diagnosed disease prevalence in fiscal year 2014 applied to the Japanese total population by age group**

|                                           | Overall    |         | 20-24     |         | 25-29     |         | 30-34     |         |
|-------------------------------------------|------------|---------|-----------|---------|-----------|---------|-----------|---------|
|                                           | 88,923,000 | (100%)  | 6,204,000 | (100%)  | 6,678,000 | (100%)  | 7,468,000 | (100%)  |
| Men                                       | 44,288,000 | (49.8%) | 3,192,000 | (51.5%) | 3,414,000 | (51.1%) | 3,788,000 | (50.7%) |
| AIDS/HIV                                  | 34,034     | (0.0%)  | 1,400     | (0.0%)  | 1,137     | (0.0%)  | 1,394     | (0.0%)  |
| Any malignancy <sup>a</sup>               | 5,775,260  | (6.5%)  | 24,047    | (0.4%)  | 60,604    | (0.9%)  | 103,907   | (1.4%)  |
| Cerebrovascular disease                   | 5,773,295  | (6.5%)  | 12,484    | (0.2%)  | 23,767    | (0.4%)  | 40,440    | (0.5%)  |
| Chronic pulmonary disease                 | 17,303,735 | (19.5%) | 656,012   | (10.6%) | 901,156   | (13.5%) | 1,184,702 | (15.9%) |
| Congestive heart failure                  | 4,317,076  | (4.9%)  | 21,322    | (0.3%)  | 34,950    | (0.5%)  | 52,469    | (0.7%)  |
| Dementia                                  | 410,326    | (0.5%)  | 418       | (0.0%)  | 0         | (0.0%)  | 1,053     | (0.0%)  |
| Diabetes mellitus                         | 12,689,040 | (14.3%) | 50,290    | (0.8%)  | 141,852   | (2.1%)  | 228,348   | (3.1%)  |
| Hemiplegia or paraplegia                  | 424,609    | (0.5%)  | 3,782     | (0.1%)  | 7,489     | (0.1%)  | 10,227    | (0.1%)  |
| Liver disease                             | 11,341,444 | (12.8%) | 129,091   | (2.1%)  | 259,190   | (3.9%)  | 380,993   | (5.1%)  |
| Metastatic solid tumor                    | 1,235,336  | (1.4%)  | 6,706     | (0.1%)  | 9,643     | (0.1%)  | 15,804    | (0.2%)  |
| Myocardial infarction                     | 769,977    | (0.9%)  | 3,510     | (0.1%)  | 3,859     | (0.1%)  | 7,438     | (0.1%)  |
| Peptic ulcer disease                      | 11,238,524 | (12.6%) | 213,860   | (3.4%)  | 364,164   | (5.5%)  | 444,445   | (6.0%)  |
| Peripheral vascular disease               | 5,197,644  | (5.8%)  | 20,276    | (0.3%)  | 42,759    | (0.6%)  | 60,055    | (0.8%)  |
| Renal disease                             | 1,261,138  | (1.4%)  | 6,164     | (0.1%)  | 11,118    | (0.2%)  | 19,957    | (0.3%)  |
| Rheumatologic disease                     | 1,928,685  | (2.2%)  | 17,602    | (0.3%)  | 35,051    | (0.5%)  | 43,777    | (0.6%)  |
| no disease                                | 57,293,691 | (64.4%) | 5,352,990 | (86.3%) | 5,500,039 | (82.4%) | 5,935,225 | (79.5%) |
| 1 disease                                 | 8,464,436  | (9.5%)  | 609,768   | (9.8%)  | 666,087   | (10.0%) | 805,022   | (10.8%) |
| 2 diseases                                | 6,799,080  | (7.6%)  | 163,269   | (2.6%)  | 310,407   | (4.6%)  | 399,222   | (5.3%)  |
| 3 diseases                                | 5,534,827  | (6.2%)  | 45,066    | (0.7%)  | 104,758   | (1.6%)  | 178,423   | (2.4%)  |
| 4 diseases                                | 4,261,753  | (4.8%)  | 19,190    | (0.3%)  | 52,301    | (0.8%)  | 77,876    | (1.0%)  |
| ≥ 5 diseases                              | 6,574,213  | (7.4%)  | 13,716    | (0.2%)  | 44,409    | (0.7%)  | 72,233    | (1.0%)  |
| Multimorbidity<br>(≥2 diseases among CCI) | 23,169,873 | (26.1%) | 241,241   | (3.9%)  | 511,875   | (7.7%)  | 727,754   | (9.7%)  |

<sup>a</sup>Any malignancy includes leukemia and lymphoma.

**Supplementary eTable 3. (continued) Diagnosed disease prevalence in fiscal year 2014 applied to the Japanese total population by age group**

|                                           | Overall    |         | 35-39     |         | 40-44     |         | 45-49     |         |
|-------------------------------------------|------------|---------|-----------|---------|-----------|---------|-----------|---------|
|                                           | 88,923,000 | (100%)  | 8,670,000 | (100%)  | 9,793,000 | (100%)  | 8,607,000 | (100%)  |
| Men                                       | 44,288,000 | (49.8%) | 4,394,000 | (50.7%) | 4,956,000 | (50.6%) | 4,329,000 | (50.3%) |
| AIDS/HIV                                  | 34,034     | (0.0%)  | 4,592     | (0.1%)  | 4,124     | (0.0%)  | 3,069     | (0.0%)  |
| Any malignancy <sup>a</sup>               | 5,775,260  | (6.5%)  | 198,069   | (2.3%)  | 308,591   | (3.2%)  | 393,299   | (4.6%)  |
| Cerebrovascular disease                   | 5,773,295  | (6.5%)  | 93,413    | (1.1%)  | 170,645   | (1.7%)  | 265,098   | (3.1%)  |
| Chronic pulmonary disease                 | 17,303,735 | (19.5%) | 1,446,109 | (16.7%) | 1,613,639 | (16.5%) | 1,462,084 | (17.0%) |
| Congestive heart failure                  | 4,317,076  | (4.9%)  | 90,394    | (1.0%)  | 155,193   | (1.6%)  | 201,862   | (2.3%)  |
| Dementia                                  | 410,326    | (0.5%)  | 734       | (0.0%)  | 1,490     | (0.0%)  | 3,606     | (0.0%)  |
| Diabetes mellitus                         | 12,689,040 | (14.3%) | 352,333   | (4.1%)  | 553,455   | (5.7%)  | 737,731   | (8.6%)  |
| Hemiplegia or paraplegia                  | 424,609    | (0.5%)  | 13,621    | (0.2%)  | 12,793    | (0.1%)  | 19,669    | (0.2%)  |
| Liver disease                             | 11,341,444 | (12.8%) | 577,316   | (6.7%)  | 784,095   | (8.0%)  | 858,769   | (10.0%) |
| Metastatic solid tumor                    | 1,235,336  | (1.4%)  | 29,912    | (0.3%)  | 56,656    | (0.6%)  | 78,055    | (0.9%)  |
| Myocardial infarction                     | 769,977    | (0.9%)  | 8,925     | (0.1%)  | 25,198    | (0.3%)  | 37,793    | (0.4%)  |
| Peptic ulcer disease                      | 11,238,524 | (12.6%) | 589,633   | (6.8%)  | 749,581   | (7.7%)  | 856,494   | (10.0%) |
| Peripheral vascular disease               | 5,197,644  | (5.8%)  | 127,339   | (1.5%)  | 201,866   | (2.1%)  | 288,167   | (3.3%)  |
| Renal disease                             | 1,261,138  | (1.4%)  | 30,634    | (0.4%)  | 46,209    | (0.5%)  | 73,397    | (0.9%)  |
| Rheumatologic disease                     | 1,928,685  | (2.2%)  | 79,300    | (0.9%)  | 108,081   | (1.1%)  | 143,756   | (1.7%)  |
| no disease                                | 57,293,691 | (64.4%) | 6,707,086 | (77.4%) | 7,389,249 | (75.5%) | 6,205,507 | (72.1%) |
| 1 disease                                 | 8,464,436  | (9.5%)  | 879,686   | (10.1%) | 969,263   | (9.9%)  | 762,446   | (8.9%)  |
| 2 diseases                                | 6,799,080  | (7.6%)  | 529,075   | (6.1%)  | 633,182   | (6.5%)  | 588,650   | (6.8%)  |
| 3 diseases                                | 5,534,827  | (6.2%)  | 284,566   | (3.3%)  | 352,334   | (3.6%)  | 416,546   | (4.8%)  |
| 4 diseases                                | 4,261,753  | (4.8%)  | 152,965   | (1.8%)  | 232,087   | (2.4%)  | 297,143   | (3.5%)  |
| ≥ 5 diseases                              | 6,574,213  | (7.4%)  | 116,621   | (1.3%)  | 216,885   | (2.2%)  | 336,707   | (3.9%)  |
| Multimorbidity<br>(≥2 diseases among CCI) | 23,169,873 | (26.1%) | 1,083,227 | (12.5%) | 1,434,488 | (14.6%) | 1,639,046 | (19.0%) |



<sup>a</sup>Any malignancy includes leukemia and lymphoma.

**Supplementary eTable 3. (continued) Diagnosed disease prevalence in fiscal year 2014 applied to the Japanese total population by age group**

|                             | Overall    |         | 50-54     |         | 55-59     |         | 60-64     |         |
|-----------------------------|------------|---------|-----------|---------|-----------|---------|-----------|---------|
|                             | 88,923,000 | (100%)  | 7,790,000 | (100%)  | 7,655,000 | (100%)  | 8,979,000 | (100%)  |
| Men                         | 44,288,000 | (49.8%) | 3,903,000 | (50.1%) | 3,802,000 | (49.7%) | 4,406,000 | (49.1%) |
| AIDS/HIV                    | 34,034     | (0.0%)  | 2,979     | (0.0%)  | 3,324     | (0.0%)  | 5,281     | (0.1%)  |
| Any malignancy <sup>a</sup> | 5,775,260  | (6.5%)  | 483,592   | (6.2%)  | 624,101   | (8.2%)  | 958,696   | (10.7%) |
| Cerebrovascular disease     | 5,773,295  | (6.5%)  | 387,663   | (5.0%)  | 573,513   | (7.5%)  | 965,151   | (10.7%) |
| Chronic pulmonary disease   | 17,303,735 | (19.5%) | 1,469,169 | (18.9%) | 1,565,078 | (20.4%) | 2,074,822 | (23.1%) |
| Congestive heart failure    | 4,317,076  | (4.9%)  | 316,491   | (4.1%)  | 443,956   | (5.8%)  | 694,542   | (7.7%)  |
| Dementia                    | 410,326    | (0.5%)  | 7,254     | (0.1%)  | 14,375    | (0.2%)  | 27,048    | (0.3%)  |
| Diabetes mellitus           | 12,689,040 | (14.3%) | 1,028,899 | (13.2%) | 1,477,049 | (19.3%) | 2,197,472 | (24.5%) |
| Hemiplegia or paraplegia    | 424,609    | (0.5%)  | 26,826    | (0.3%)  | 43,702    | (0.6%)  | 56,416    | (0.6%)  |
| Liver disease               | 11,341,444 | (12.8%) | 1,063,948 | (13.7%) | 1,316,086 | (17.2%) | 1,785,515 | (19.9%) |
| Metastatic solid tumor      | 1,235,336  | (1.4%)  | 104,654   | (1.3%)  | 136,279   | (1.8%)  | 204,377   | (2.3%)  |
| Myocardial infarction       | 769,977    | (0.9%)  | 65,457    | (0.8%)  | 76,970    | (1.0%)  | 130,757   | (1.5%)  |
| Peptic ulcer disease        | 11,238,524 | (12.6%) | 977,192   | (12.5%) | 1,190,533 | (15.6%) | 1,633,285 | (18.2%) |
| Peripheral vascular disease | 5,197,644  | (5.8%)  | 411,839   | (5.3%)  | 554,776   | (7.2%)  | 876,673   | (9.8%)  |
| Renal disease               | 1,261,138  | (1.4%)  | 95,578    | (1.2%)  | 126,432   | (1.7%)  | 202,057   | (2.3%)  |
| Rheumatologic disease       | 1,928,685  | (2.2%)  | 191,910   | (2.5%)  | 235,332   | (3.1%)  | 326,918   | (3.6%)  |
| no disease                  | 57,293,691 | (64.4%) | 5,087,646 | (65.3%) | 4,435,684 | (57.9%) | 4,468,987 | (49.8%) |
| 1 disease                   | 8,464,436  | (9.5%)  | 687,805   | (8.8%)  | 680,727   | (8.9%)  | 859,388   | (9.6%)  |
| 2 diseases                  | 6,799,080  | (7.6%)  | 631,794   | (8.1%)  | 687,732   | (9.0%)  | 933,542   | (10.4%) |
| 3 diseases                  | 5,534,827  | (6.2%)  | 510,570   | (6.6%)  | 638,438   | (8.3%)  | 881,741   | (9.8%)  |
| 4 diseases                  | 4,261,753  | (4.8%)  | 382,265   | (4.9%)  | 509,123   | (6.7%)  | 729,058   | (8.1%)  |
| ≥ 5 diseases                | 6,574,213  | (7.4%)  | 489,921   | (6.3%)  | 703,297   | (9.2%)  | 1,106,284 | (12.3%) |

|                                           |            |         |           |         |           |         |           |         |
|-------------------------------------------|------------|---------|-----------|---------|-----------|---------|-----------|---------|
| Multimorbidity<br>(≥2 diseases among CCI) | 23,169,873 | (26.1%) | 2,014,550 | (25.9%) | 2,538,590 | (33.2%) | 3,650,625 | (40.7%) |
|-------------------------------------------|------------|---------|-----------|---------|-----------|---------|-----------|---------|

<sup>a</sup>Any malignancy includes leukemia and lymphoma.

**Supplementary eTable 3. (continued) Diagnosed disease prevalence in fiscal year 2014 applied to the Japanese total population by age group**

|                             | Overall    |         | 65-69     |         | 70-74     |         |
|-----------------------------|------------|---------|-----------|---------|-----------|---------|
|                             | 88,923,000 | (100%)  | 9,155,000 | (100%)  | 7,929,000 | (100%)  |
| Men                         | 44,288,000 | (49.8%) | 4,414,000 | (48.2%) | 3,690,000 | (46.5%) |
| AIDS/HIV                    | 34,034     | (0.0%)  | 3,793     | (0.0%)  | 2,940     | (0.0%)  |
| Any malignancy <sup>a</sup> | 5,775,260  | (6.5%)  | 1,296,908 | (14.2%) | 1,323,445 | (16.7%) |
| Cerebrovascular disease     | 5,773,295  | (6.5%)  | 1,404,663 | (15.3%) | 1,836,456 | (23.2%) |
| Chronic pulmonary disease   | 17,303,735 | (19.5%) | 2,445,425 | (26.7%) | 2,485,540 | (31.3%) |
| Congestive heart failure    | 4,317,076  | (4.9%)  | 931,107   | (10.2%) | 1,374,790 | (17.3%) |
| Dementia                    | 410,326    | (0.5%)  | 83,286    | (0.9%)  | 271,063   | (3.4%)  |
| Diabetes mellitus           | 12,689,040 | (14.3%) | 2,891,848 | (31.6%) | 3,029,762 | (38.2%) |
| Hemiplegia or paraplegia    | 424,609    | (0.5%)  | 81,998    | (0.9%)  | 148,087   | (1.9%)  |
| Liver disease               | 11,341,444 | (12.8%) | 2,094,406 | (22.9%) | 2,092,035 | (26.4%) |
| Metastatic solid tumor      | 1,235,336  | (1.4%)  | 300,280   | (3.3%)  | 292,970   | (3.7%)  |
| Myocardial infarction       | 769,977    | (0.9%)  | 197,033   | (2.2%)  | 213,037   | (2.7%)  |
| Peptic ulcer disease        | 11,238,524 | (12.6%) | 2,053,538 | (22.4%) | 2,165,800 | (27.3%) |
| Peripheral vascular disease | 5,197,644  | (5.8%)  | 1,181,335 | (12.9%) | 1,432,557 | (18.1%) |
| Renal disease               | 1,261,138  | (1.4%)  | 257,988   | (2.8%)  | 391,604   | (4.9%)  |
| Rheumatologic disease       | 1,928,685  | (2.2%)  | 374,826   | (4.1%)  | 372,134   | (4.7%)  |
| no disease                  | 57,293,691 | (64.4%) | 3,803,485 | (41.5%) | 2,407,794 | (30.4%) |
| 1 disease                   | 8,464,436  | (9.5%)  | 785,842   | (8.6%)  | 758,403   | (9.6%)  |
| 2 diseases                  | 6,799,080  | (7.6%)  | 1,013,307 | (11.1%) | 908,900   | (11.5%) |
| 3 diseases                  | 5,534,827  | (6.2%)  | 1,074,487 | (11.7%) | 1,047,899 | (13.2%) |
| 4 diseases                  | 4,261,753  | (4.8%)  | 886,159   | (9.7%)  | 923,584   | (11.6%) |

|                                           |            |         |           |         |           |         |
|-------------------------------------------|------------|---------|-----------|---------|-----------|---------|
| ≥ 5 diseases                              | 6,574,213  | (7.4%)  | 1,591,721 | (17.4%) | 1,882,418 | (23.7%) |
| Multimorbidity<br>(≥2 diseases among CCI) | 23,169,873 | (26.1%) | 4,565,674 | (49.9%) | 4,762,801 | (60.1%) |

<sup>a</sup>Any malignancy includes leukemia and lymphoma.

**Supplementary eTable 4. Hazard ratios in multimorbid individuals based on hospitalisation or death rates in a 5-year cohort of  $n = 111\ 088$  men and  $n = 70\ 871$  women. Cox regression analysis**

| Overall <sup>a</sup> | Full Model |       | 20-39 years |       | 40-59 years |       | 60-71 years |       |      |      |      |      |
|----------------------|------------|-------|-------------|-------|-------------|-------|-------------|-------|------|------|------|------|
|                      | HR         | 95%CI | HR          | 95%CI | HR          | 95%CI | HR          | 95%CI |      |      |      |      |
| Age                  | 1.02       | 1.01  | 1.02        |       |             |       |             |       |      |      |      |      |
| Sex                  | 0.97       | 0.95  | 0.99        | 0.36  | 0.34        | 0.37  | 1.29        | 1.25  | 1.33 | 1.44 | 1.38 | 1.51 |
| ≥2 diseases          | 2.17       | 2.12  | 2.21        | 2.17  | 2.05        | 2.29  | 2.31        | 2.24  | 2.38 | 2.05 | 1.97 | 2.14 |
| Men <sup>b</sup>     |            |       |             |       |             |       |             |       |      |      |      |      |
| Age                  | 1.03       | 1.03  | 1.04        |       |             |       |             |       |      |      |      |      |
| ≥2 diseases          | 2.04       | 1.98  | 2.10        | 2.81  | 2.56        | 3.07  | 2.25        | 2.17  | 2.34 | 1.94 | 1.84 | 2.04 |
| Women <sup>b</sup>   |            |       |             |       |             |       |             |       |      |      |      |      |
| Age                  | 0.99       | 0.99  | 1.00        |       |             |       |             |       |      |      |      |      |
| ≥2 diseases          | 2.22       | 2.15  | 2.30        | 1.91  | 1.78        | 2.04  | 2.42        | 2.30  | 2.54 | 2.28 | 2.12 | 2.44 |

<sup>a</sup>References are female for sex, no disease for morbidity variables

<sup>b</sup>Reference is no disease for morbidity variables

HR; hazard ratio, CI; confidence interval
